# Supplementary material for: Clinical Decision Support Systems for Drug Allergy Checking: Systematic Review
Source: PubMed Central journal article supplement (PMC6231757; doi:10.2196/jmir.8206), 2018-09-07
Supplement: jmir_v20i9e258_app3.pdf [file jmir_v20i9e258_app3.pdf]

Multimedia Appendix 3. Table with the number of subjects included in the review.

| Authors (year)                                        | Number of subjects                                                                                                  |
|-------------------------------------------------------|---------------------------------------------------------------------------------------------------------------------|
| <b>DOCUMENTING THE PRESENCE/ABSENCE OF AN ALLERGY</b> |                                                                                                                     |
| Burrell et al. (2013) [32]                            | Patients:<br>- total: 2,174 (pre: 1,016 & post: 1,158)<br><br>Allergies:<br>- total: 1,686 (pre: 770 & post: 916)   |
| Cresswell et al. (2008) [35]                          | -                                                                                                                   |
| Fernando et al. (2014) [30]                           | Interviews: 21                                                                                                      |
| Ferner et al. (2010) [36]                             | -                                                                                                                   |
| Gay et al. (2009) [33]                                | Medical and surgical inpatients: 117                                                                                |
| Hsieh et al. (2004) [37]                              | Patients: 1,150 - subset of 320<br>Alerts: 7,761<br>Overrides: 6,182                                                |
| Kuperman et al. (2007) [14]                           | -                                                                                                                   |
| Lopez-Gonzalez et al. (2009) [38]                     | Articles: 1630<br>Inclusion: 45                                                                                     |
| Mawby (2006) [34]                                     | -                                                                                                                   |
| Mills (1964) [31]                                     | Member hospitals mailed: 450<br>Responses: 332 (73.7%)                                                              |
| Porter et al. (2006) [39]                             | Parent-child dyads observed at triage: 256                                                                          |
| Rimawi et al. (2013) [40]                             | Patients with proven penicillin tolerance rehospitalized within a one-year period from the penicillin skin test: 55 |
| Ross et al. (2013) [41]                               | Prescribers: 40<br>Prescribing errors questioned about: 100                                                         |
| Schiff et al. (1998) [42]                             | -                                                                                                                   |
| <b>CODING</b>                                         |                                                                                                                     |
| Abookire et al. (2000) [43]                           | -                                                                                                                   |
| Benkhaial et al. (2009) [44]                          | Inpatients: 200                                                                                                     |
| Bernstein (2014) [45]                                 | -                                                                                                                   |
| Chaffee et al. (2010) [46]                            | -                                                                                                                   |
| Demner-Fushman et al. (2009) [47]                     | -                                                                                                                   |
| Goss et al. (2013) [48]                               | Terminologies compared: 5                                                                                           |
| Greibe (2013) [49]                                    | -                                                                                                                   |
| Ogallo et al. (2015) [50]                             | -                                                                                                                   |
| Paul et al. (2012) [51]                               | -                                                                                                                   |
| Slight et al. (2015) [52]                             | Professionals (academicians, practitioners, policy makers and senior management officials): 35                      |
| <b>RULE BASES</b>                                     |                                                                                                                     |
| Baysari et al. (2013) [53]                            | Prescribers: 68                                                                                                     |
| Chaffee et al. (2010) [46]                            | -                                                                                                                   |
| Evans et al. (1998) [54]                              | Patients:<br>- 1,136 (pre-intervention period)<br>- 545 (post-intervention period)                                  |
| Kesselheim et al. (2011) [55]                         | -                                                                                                                   |
| Kuperman et al. (2007) [14]                           | -                                                                                                                   |
| Mahoney et al. (2007) [56]                            | Inpatient medication orders:<br>- 1,452,346 (pre-implementation period)<br>- 1,390,789 (post-implementation period) |
| <b>ALERTS AND ALERT FATIGUE</b>                       |                                                                                                                     |
| Abookire et al. (2000) [43]                           | -                                                                                                                   |
| Ariosto (2014) [57]                                   | Patients: 30,321                                                                                                    |
| Baysari et al. (2013) [53]                            | Prescribers: 68                                                                                                     |

|                                     |                                                                                                                                                                                         |
|-------------------------------------|-----------------------------------------------------------------------------------------------------------------------------------------------------------------------------------------|
| Brodowy et al. (2016) [58]          | DA alerts per order:<br>- period 1: 0.14<br>- period 2: 0.09                                                                                                                            |
| Bryant et al. (2014) [59]           | Physicians: 461<br>Alerts: 2,455 / 18,354 orders                                                                                                                                        |
| Carspecken et al. (2013) [60]       | Patients: 1                                                                                                                                                                             |
| Chaffee et al. (2010) [46]          | -                                                                                                                                                                                       |
| Coleman et al. (2013) [18]          | -                                                                                                                                                                                       |
| Dekarske et al. (2015) [61]         | Clinicians: 22 (2 cohorts)<br>Alerts: 1829<br>- phase 1: 820 (44.8%)<br>- phase 2: 1,009 (55.2%)                                                                                        |
| Falade et al. (2012) [62]           | Patients: 763<br>Medication warnings: 8,235                                                                                                                                             |
| Genco et al. (2016) [63]            | Patient visits: 4,581                                                                                                                                                                   |
| González-Gregori et al. (2012) [64] | Patients: 15,534                                                                                                                                                                        |
| Horsky et al. (2012) [65]           | Articles included: 112                                                                                                                                                                  |
| Hsieh et al. (2004) [37]            | Patients: 1,150 - subset of 320<br>Alerts: 7,761<br>Overrides: 6,182                                                                                                                    |
| Hunteman et al. (2009) [66]         | Allergy alerts: 643 / 49,887 (1.3% of total number of all types of alerts)                                                                                                              |
| Jani et al. (2011) [67]             | Order items: 26,836<br>Alerts: 16,182<br>- Visible alerts: 3,507<br>- Overridden alerts: 3,119                                                                                          |
| Kesselheim et al. (2011) [55]       | -                                                                                                                                                                                       |
| Knight et al. (2015) [68]           | Patients: 6,646<br>Warnings: 40,391                                                                                                                                                     |
| Kuperman et al. (2003) [69]         | -                                                                                                                                                                                       |
| Lee et al. (2014) [70]              | Alerts: 107,917<br>- dosing: 74,312 (68.9 %)<br>- DA: 14,943 (13.8 %)<br>- drug-drug: 18,662 (17.3 %)                                                                                   |
| Lin et al. (2008) [71]              | 2001<br>Critical orders: 215 / 42,621 (0.5%)<br>DA order check override: 72 / 105 (69%)<br><br>2006<br>Critical orders: 908 / 37,040 (2.5%)<br>DA order check override: 341 / 420 (81%) |
| Lopez et al. (2012) [72]            | Patients: 15,534<br>EMR of patients containing allergy information: 10,013 (64.45%)                                                                                                     |
| McCoy et al. (2014) [73]            | -                                                                                                                                                                                       |
| Nanji et al. (2014) [74]            | Medication orders: 2,004,069<br>CDS alerts: 157,483<br>Alert overrides: 82,889 (52.6%)                                                                                                  |
| Russ et al. (2014) [75]             | Prescribers: 40<br>Prescribing errors questioned about: 100                                                                                                                             |
| Schiff et al. (1998) [42]           | -                                                                                                                                                                                       |
| Shah et al. (2006) [76]             | Drug alerts: 18,115<br>- Noninterruptive: 12,933 (71%)<br>- Interruptive: 5,182 (29%)                                                                                                   |
| Slight et al. (2017) [1]            | Patients: 29,420 patients<br>DA alerts: 158,023<br>DA alert override: 128,157 (81%)                                                                                                     |
| Stultz et al. (2012) [19]           | Articles included: 44                                                                                                                                                                   |

|                                   |                                                                                                                                                                             |
|-----------------------------------|-----------------------------------------------------------------------------------------------------------------------------------------------------------------------------|
| Swiderski et al. (2007) [77]      | Orders: 29,483<br>Allergy alerts: 777<br>- accepted: 342 (44%)<br>- overridden: 435 (56%)                                                                                   |
| Tamblyn et al. (2008) [78]        | Physicians: 28<br>- on-demand CDDS: 14 (50 %)<br>- automatic CDDS: 14 (50 %)<br><br>Patients: 3,449<br>- on-demand CDDS: 1,550 (44.9 %)<br>- automatic CDDS: 1,899 (55.1 %) |
| Taylor et al. (2004) [79]         | Electronic prescriptions: 6,260<br>Drug alerts: 1,869                                                                                                                       |
| Topaz et al. (2015) [17]          | DA alerts: 611,192                                                                                                                                                          |
| Topaz et al. (2016) [80]          | Opioid drug allergy interaction (DAI) alerts: 342,338                                                                                                                       |
| Weingart et al. (2009) [81]       | Ambulatory care clinicians: 300<br>Responses: 184 (61%)                                                                                                                     |
| Weingart et al. (2009) [82]       | Clinicians: 25                                                                                                                                                              |
| OUTCOMES                          |                                                                                                                                                                             |
| Bates et al. (1998) [83]          | Medical units:<br>- 6 (phase 1) & 8 (phase 2)<br>Admissions:<br>- phase 1: 2,491 & phase 2: 4,220<br>Patient-days:<br>- phase 1: 12,218 & phase 2: 24,539                   |
| Bates et al. (1999) [84]          | -                                                                                                                                                                           |
| Beccaro et al. (2010) [85]        | -                                                                                                                                                                           |
| Benkhaial et al. (2009) [44]      | Inpatients: 200                                                                                                                                                             |
| Evans et al. (1998) [54]          | Patients:<br>- 1,136 (pre-intervention period) & 545 (post-intervention period)                                                                                             |
| Fung et al. (2003) [86]           | Physicians: 4,200<br>Allied health professionals: 4,000                                                                                                                     |
| Harolds et al. (2016) [87]        | -                                                                                                                                                                           |
| Hsieh et al. (2004) [37]          | Patients: 1,150 - subset of 320<br>Alerts: 7,761<br>Overrides: 6,182                                                                                                        |
| Kaushal et al. (2003) [22]        | Articles included: 12                                                                                                                                                       |
| Kuperman et al. (2001) [16]       | -                                                                                                                                                                           |
| Leu et al. (2013) [88]            | -                                                                                                                                                                           |
| Mahoney et al. (2007) [56]        | Inpatient medication orders:<br>- 1,452,346 (pre-implementation period)<br>- 1,390,789 (post-implementation period)                                                         |
| Oliven et al. (2005) [89]         | 2 Departments:<br>- A [handwritten] & B [CPOE]<br>Hospitalization days:<br>- 10,002 (A:4,969 & B:5,033)<br>Patients:<br>- 1,350 (A: 641 & B:709)                            |
| Schiff et al. (1998) [42]         | -                                                                                                                                                                           |
| Stultz et al. (2012) [19]         | Articles included: 44                                                                                                                                                       |
| van der Linden et al. (2013) [90] | Articles included: 45                                                                                                                                                       |
| Varkey et al. (2007) [91]         | Orders: 4,527                                                                                                                                                               |
